# Supplementary material
Source: Springer Nature journal article supplement (https://www.springermedizin.de/resource/supplementary/12937_2006_98_MOESM2_ESM.pdf/25654392)

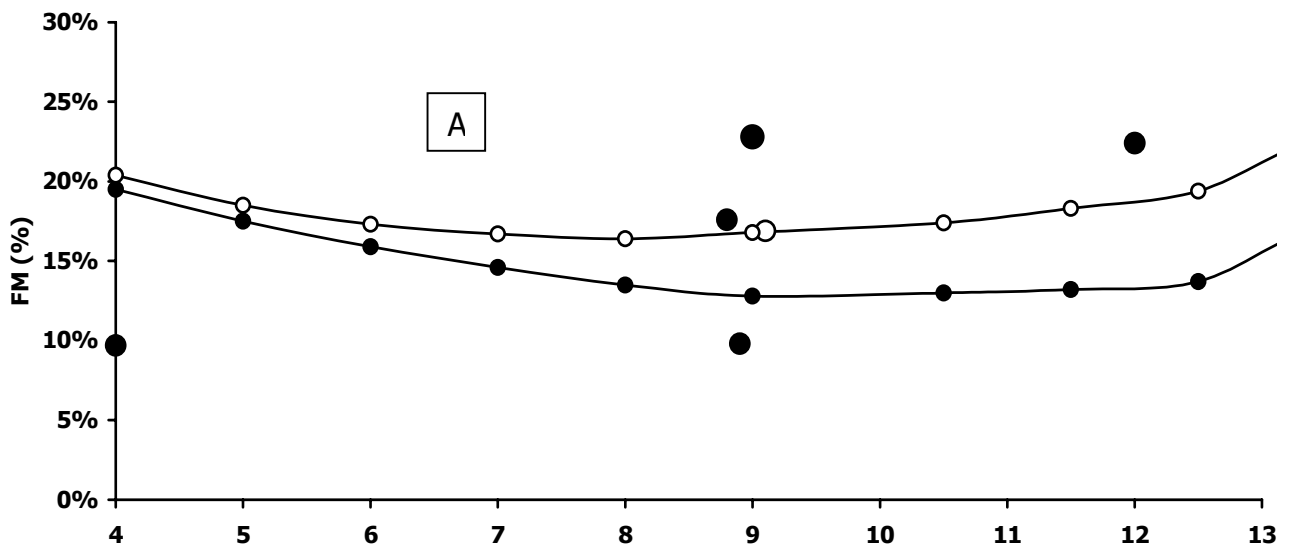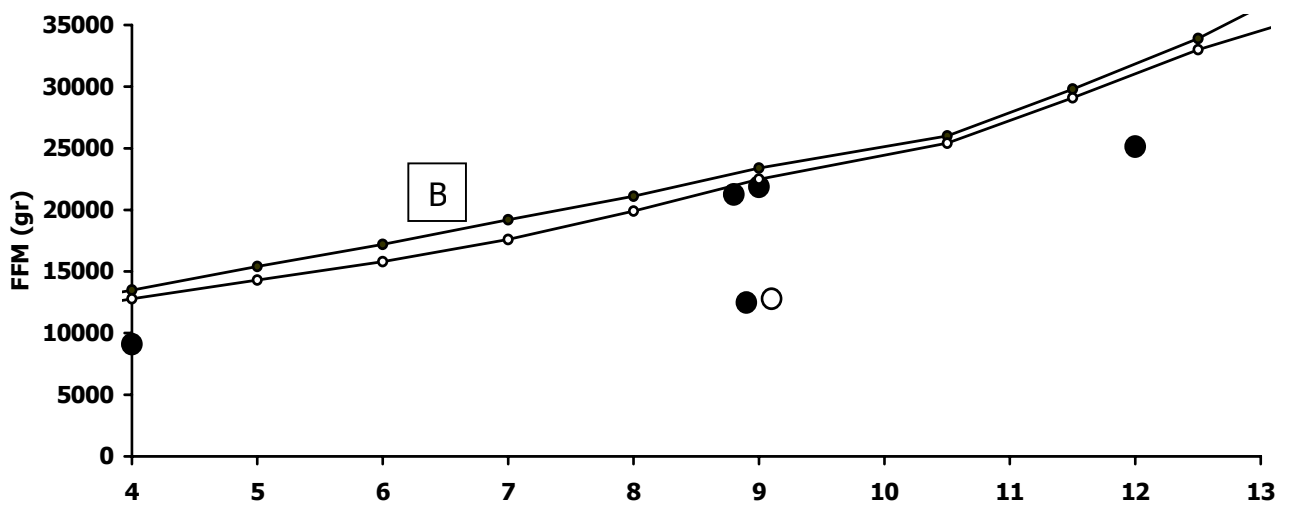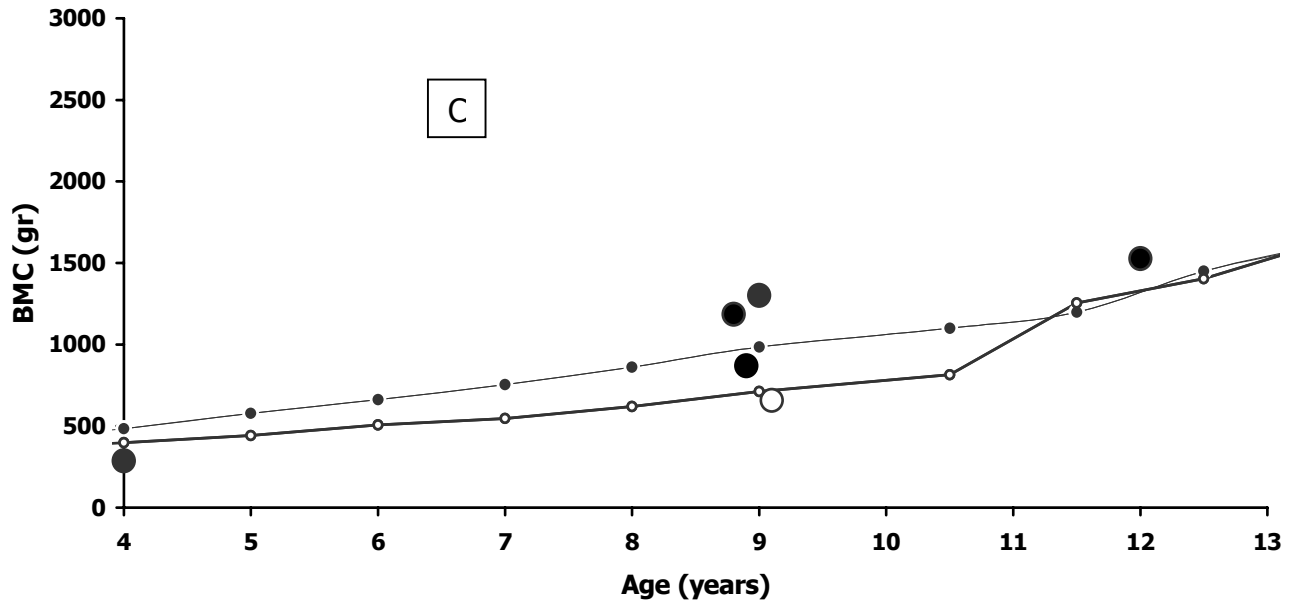

● RE males ○ RE females —●— males —○— females

Supplement: MOESM2 [file 25654392]
